# Supplementary material for: Compounded Wind Gusts and Maximum Temperature via Semiparametric copula joint density modelling in the risk assessments of power blackouts and air-conditioning demands for major cities in Canada
Source: Research Square preprint supplement (doi:10.21203/rs.3.rs-3852047/v1), 2024-01-17
Supplement: Supplementary file 1 [file d87b631a3e23d5b99d2eac7b.docx]

**List of Tables**

**Compounded extreme Wind Gusts and Maximum Temperature via Semiparametric copula joint density modelling in the risk assessments of power blackouts and air-conditioning demands for major cities in Canada**

Shahid Latif1* and Taha B.M.J. Ouarda1

1Canada Research Chair in Statistical Hydro-Climatology, Institut national de la recherche scientifique, Centre Eau Terre Environnement, INRS-ETE, 490 De la Couronne, Québec City, QC, Canada

*Corresponding author Email address: [Md_Shahid.LATIF@inrs.ca](mailto:Md_Shahid.LATIF@inrs.ca)

Table 1: Comparing bivariate versus univariate joint RPs (for different bivariate hazard scenario, i.e., AND and OR scenario) for station (a) Montreal (b) Quebec City (c) Ottawa (d) Toronto (e) Vancouver (f) Regina (g) Edmonton

| 1. MONTREAL | | | | | | | | | | | | | | | | | | |
| --- | --- | --- | --- | --- | --- | --- | --- | --- | --- | --- | --- | --- | --- | --- | --- | --- | --- | --- |
| Univariate RPs (years) | Design quantiles (AMWGS (km/hr)) | Design quantiles (Corresponding highest MT (Time lag = 0day) ()) | | OR-JRP (AMWGS-MT (Time lag = 0 day)  (Years) | AND-JRP (AMWGS-MT (Time lag = 0 day)  (Years) | | Design quantiles (Corresponding highest MT (Time lag = ±1 days) ()) | OR-JRP (AMWGS-MT (Time lag = ±1 days)  (Years) | AND-JRP (MT-WGS (Time lag = ±1 days)  (Years) | | Design quantiles (Corresponding highest MT (Time lag = ±2 days) ()) | OR-JRP (AMWGS-MT (Time lag = ±2 days)  (Years) | AND-JRP (AMWGS-MT (Time lag = ±2 days)  (Years) | | Design quantiles (Corresponding highest MT (Time lag = ±3 days) ()) | OR-JRP (AMWGS-MT (Time lag = ±3 days)  (Years) | | AND-JRP (AMWGS-MT (Time lag = ±3 days)  (Years) |
| 2 | 80.16 | 27.24 | | 1.44 | 3.30 | | 28.79 | 3.57 | 3.57 | | 29.04 | 1.43 | 3.30 | | 29.07 | 1.37 | | 3.73 |
| 5 | 94.24 | 30.25 | | 3.14 | 12.31 | | 31.20 | 1.51 | 15.64 | | 31.28 | 2.91 | 17.91 | | 31.30 | 2.89 | | 18.37 |
| 10 | 102.00 | 31.41 | | 6.03 | 29.22 | | 32.19 | 1.21 | 41.36 | | 32.26 | 5.40 | 68.08 | | 32.28 | 5.51 | | 53.82 |
| 20 | 108.01 | 32.31 | | 11.84 | 64.36 | | 32.79 | 1.10 | 98.47 | | 32.84 | 10.39 | 265.17 | | 32.85 | 10.77 | | 140.03 |
| 30 | 112.42 | 32.72 | | 17.65 | 99.89 | | 33.05 | 1.06 | 157.67 | | 33.09 | 15.39 | 591.30 | | 33.08 | 16.03 | | 233.40 |
| 50 | 122.16 | 33.14 | | 29.27 | 171.22 | | 33.30 | 1.04 | 277.74 | | 33.33 | 25.39 | 1630.52 | | 33.31 | 26.56 | | 426.95 |
| 70 | 124.66 | 33.37 | | 40.90 | 242.65 | | 33.44 | 1.03 | 398.55 | | 33.46 | 35.39 | 3185.73 | | 33.43 | 37.08 | | 623.79 |
| 80 | 125.17 | 33.45 | | 46.71 | 278.39 | | 33.49 | 1.02 | 459.07 | | 33.51 | 40.39 | 4158.00 | | 33.48 | 42.34 | | 722.75 |
| 90 | 125.52 | 33.52 | | 52.52 | 314.13 | | 33.54 | 1.02 | 519.64 | | 33.55 | 45.39 | 5257.62 | | 33.52 | 47.61 | | 821.90 |
| 100 | 125.78 | 33.58 | | 58.34 | 349.87 | | 33.57 | 1.02 | 580.21 | | 33.59 | 50.39 | 6485.08 | | 33.55 | 52.87 | | 921.23 |
| Univariate RPs (years) | | | Design quantiles (Annual highest MT (°C)) | | | Design quantiles (Corresponding WGS (Time lag = 0day) (km/hr)) | | | | OR-JRP (AHMT-WGS (Time lag = 0 day)  (Years) | | | | AND-JRP (AHMT-WGS (Time lag = 0 day)  (Years) | | |
| 2 | | | 32.53 | | | 40.34 | | | | 1.44 | | | | 3.30 | | |
| 5 | | | 33.78 | | | 57.64 | | | | 2.91 | | | | 17.89 | | |
| 10 | | | 34.40 | | | 68.75 | | | | 5.40 | | | | 67.97 | | |
| 20 | | | 35.33 | | | 79.75 | | | | 10.39 | | | | 264.73 | | |
| 30 | | | 36.06 | | | 82.34 | | | | 15.39 | | | | 590.28 | | |
| 50 | | | 37.41 | | | 85.59 | | | | 25.39 | | | | 1627.87 | | |
| 70 | | | 37.54 | | | 86.51 | | | | 35.39 | | | | 3180.66 | | |
| 80 | | | 37.56 | | | 86.69 | | | | 40.39 | | | | 4149.38 | | |
| 90 | | | 37.58 | | | 86.81 | | | | 45.39 | | | | 5249.34 | | |
| 100 | | | 37.60 | | | 86.90 | | | | 50.39 | | | | 6476.68 | | |

| 1. QUEBEC CITY | | | | | | | | | | | | | |
| --- | --- | --- | --- | --- | --- | --- | --- | --- | --- | --- | --- | --- | --- |
| Univariate RPs (years) | Design quantiles (AMWGS (km/hr)) | Design quantiles (Corresponding highest MT (Time lag = 0day) ()) | OR-JRP (AMWGS-MT (Time lag = 0 day)  (Years) | AND-JRP (AMWGS-MT (Time lag = 0 day)  (Years) | Design quantiles (Corresponding highest MT (Time lag = ±1 days) ()) | OR-JRP (AMWGS-MT (Time lag = ±1 days)  (Years) | AND-JRP (AMWGS-MT (Time lag = ±1 days)  (Years) | Design quantiles (Corresponding highest MT (Time lag = ±2 days) ()) | OR-JRP (AMWGS-MT (Time lag = ±2 days)  (Years) | AND-JRP (AMWGS-MT (Time lag = ±2 days)  (Years) | Design quantiles (Corresponding highest MT (Time lag = ±3 days) ()) | OR-JRP (AMWGS-MT (Time lag = ±3 days)  (Years) | AND-JRP (AMWGS-MT (Time lag = ±3 days)  (Years) |
| 2 | 80.85 | 26.79 | 1.46 | 3.16 | 27.41 | 1.42 | 3.36 | 27.68 | 1.41 | 3.41 | 28.45 | 1.42 | 3.38 |
| 5 | 103.92 | 30.12 | 3.10 | 12.87 | 30.21 | 3.14 | 12.21 | 30.67 | 3.10 | 12.87 | 30.41 | 3.13 | 12.46 |
| 10 | 123.97 | 31.59 | 5.71 | 40.38 | 31.41 | 6.05 | 28.87 | 32.21 | 5.95 | 31.24 | 32.23 | 6.01 | 29.78 |
| 20 | 139.80 | 32.66 | 10.78 | 137.73 | 32.27 | 11.83 | 64.59 | 33.26 | 11.63 | 71.47 | 32.99 | 11.75 | 67.19 |
| 30 | 147.12 | 33.18 | 15.81 | 291.43 | 32.68 | 17.60 | 101.65 | 33.73 | 17.28 | 113.78 | 33.22 | 17.47 | 106.21 |
| 50 | 174.46 | 33.75 | 25.84 | 767.75 | 33.12 | 29.09 | 177.66 | 34.22 | 28.54 | 201.40 | 33.45 | 28.87 | 186.51 |
| 70 | 177.44 | 34.09 | 35.85 | 1469.29 | 33.39 | 40.57 | 255.02 | 34.50 | 39.78 | 291.26 | 33.57 | 40.25 | 268.46 |
| 80 | 178.36 | 34.22 | 40.86 | 1904.40 | 33.49 | 46.30 | 294.02 | 34.61 | 45.39 | 336.71 | 33.61 | 45.93 | 309.85 |
| 90 | 179.10 | 34.34 | 45.86 | 2395.78 | 33.57 | 52.03 | 333.18 | 34.70 | 51.00 | 382.45 | 33.65 | 51.61 | 351.43 |
| 100 | 179.71 | 34.43 | 50.86 | 2943.77 | 33.65 | 57.75 | 372.45 | 34.77 | 56.60 | 428.41 | 33.69 | 57.28 | 393.14 |

| 1. OTTAWA | | | | | | | | | | | | | |
| --- | --- | --- | --- | --- | --- | --- | --- | --- | --- | --- | --- | --- | --- |
| Univariate RPs (years) | Design quantiles (AMWGS (km/hr)) | Design quantiles (Corresponding highest MT (Time lag = 0day) ()) | OR-JRP (AMWGS-MT (Time lag = 0 day)  (Years) | AND-JRP (AMWGS-MT (Time lag = 0 day)  (Years) | Design quantiles (Corresponding highest MT (Time lag = ±1 days) ()) | OR-JRP (AMWGS-MT (Time lag = ±1 days)  (Years) | AND-JRP (AMWGS-MT (Time lag = ±1 days)  (Years) | Design quantiles (Corresponding highest MT (Time lag = ±2 days) ()) | OR-JRP (AMWGS-MT (Time lag = ±2 days)  (Years) | AND-JRP (AMWGS-MT (Time lag = ±2 days)  (Years) | Design quantiles (Corresponding highest MT (Time lag = ±3 days) ()) | OR-JRP (AMWGS-MT (Time lag = ±3 days)  (Years) | AND-JRP (AMWGS-MT (Time lag = ±3 days)  (Years) |
| 2 | 77.05 | 27.38 | 1.37 | 3.70 | 28.92 | 1.41 | 3.44 | 29.27 | 1.40 | 3.51 | 29.61 | 1.38 | 3.66 |
| 5 | 86.32 | 30.44 | 2.86 | 19.80 | 31.36 | 3.09 | 13.18 | 31.88 | 3.03 | 14.23 | 32.27 | 2.95 | 16.53 |
| 10 | 93.85 | 31.83 | 5.39 | 69.63 | 32.80 | 5.91 | 32.38 | 33.12 | 5.79 | 36.46 | 33.59 | 5.60 | 46.51 |
| 20 | 102.53 | 33.17 | 10.43 | 243.42 | 34.14 | 11.54 | 74.89 | 34.17 | 11.29 | 87.63 | 34.58 | 10.89 | 122.55 |
| 30 | 109.51 | 33.86 | 15.46 | 505.28 | 34.67 | 17.14 | 119.90 | 34.70 | 16.76 | 143.19 | 35.04 | 16.15 | 210.85 |
| 50 | 131.00 | 34.56 | 25.50 | 1266.30 | 35.28 | 28.31 | 213.59 | 35.32 | 27.65 | 261.16 | 35.57 | 26.63 | 409.10 |
| 70 | 132.54 | 34.93 | 35.54 | 2317.50 | 35.68 | 39.45 | 310.04 | 35.71 | 38.50 | 384.54 | 35.89 | 37.07 | 626.13 |
| 80 | 133.02 | 35.05 | 40.55 | 2945.51 | 35.83 | 45.02 | 358.94 | 35.85 | 43.93 | 447.59 | 36.01 | 42.29 | 739.75 |
| 90 | 133.40 | 35.16 | 45.56 | 3639.01 | 35.97 | 50.58 | 408.20 | 35.98 | 49.34 | 511.35 | 36.11 | 47.50 | 856.09 |
| 100 | 133.71 | 35.24 | 50.58 | 4395.60 | 36.08 | 56.13 | 457.73 | 36.09 | 54.76 | 575.74 | 36.20 | 52.70 | 974.94 |

| 1. TORONTO | | | | | | | | | | | | | |
| --- | --- | --- | --- | --- | --- | --- | --- | --- | --- | --- | --- | --- | --- |
| Univariate RPs (years) | Design quantiles (AHMT (°C)) | Design quantiles (Corresponding maximum WGS (Time lag = 0day) (km/hr)) | OR-JRP (AHMT-WGS (Time lag = 0 day)  (Years) | AND-JRP (AHMT-WGS (Time lag = 0 day)  (Years) | Design quantiles (Corresponding maximum WGS (Time lag = ±1 days) (km/hr)) | OR-JRP (AHMT-WGS (Time lag = ±1 days)  (Years) | AND-JRP (AHMT-WGS (Time lag = ±1 days)  (Years) | Design quantiles (Corresponding maximum WGS (Time lag = ±2 days) (km/hr)) | OR-JRP (AHMT-WGS (Time lag = ±2 days)  (Years) | AND-JRP (AHMT-WGS (Time lag = ±2 days)  (Years) | Design quantiles (Corresponding maximum WGS (Time lag = ±3 days) (km/hr)) | OR-JRP (AHMT-WGS (Time lag = ±3 days)  (Years) | AND-JRP (AHMT-WGS (Time lag = ±3 days)  (Years) |
| 2 | 32.80 | 45.87 | 1.36 | 3.78 | 53.79 | 1.39 | 3.54 | 52.43 | 1.43 | 3.31 | 54.54 | 1.44 | 3.28 |
| 5 | 34.64 | 58.33 | 2.87 | 19.27 | 59.63 | 3.07 | 13.55 | 60.61 | 3.24 | 10.95 | 61.09 | 3.18 | 11.65 |
| 10 | 35.70 | 60.59 | 5.47 | 58.55 | 63.48 | 5.95 | 31.40 | 64.79 | 6.35 | 23.55 | 64.87 | 6.19 | 26.02 |
| 20 | 36.38 | 66.58 | 10.68 | 157.93 | 73.89 | 11.75 | 67.14 | 70.68 | 12.61 | 48.37 | 71.29 | 12.25 | 54.45 |
| 30 | 36.64 | 67.20 | 15.89 | 267.99 | 74.15 | 17.57 | 102.71 | 74.64 | 18.88 | 73.06 | 75.33 | 18.32 | 82.70 |
| 50 | 36.90 | 79.92 | 26.32 | 499.00 | 79.92 | 29.21 | 173.63 | 77.66 | 31.42 | 122.30 | 77.98 | 30.48 | 139.01 |
| 70 | 37.03 | 80.00 | 36.75 | 735.51 | 80.01 | 40.85 | 244.37 | 78.87 | 43.98 | 171.48 | 79.06 | 42.65 | 195.20 |
| 80 | 37.07 | 80.03 | 41.96 | 854.70 | 80.03 | 46.67 | 279.75 | 79.26 | 50.25 | 196.06 | 79.40 | 48.73 | 223.28 |
| 90 | 37.11 | 80.05 | 47.18 | 974.28 | 80.05 | 52.50 | 315.09 | 79.57 | 56.53 | 220.63 | 79.67 | 54.81 | 251.36 |
| 100 | 37.14 | 80.07 | 52.39 | 1094.09 | 80.07 | 58.32 | 350.41 | 79.82 | 62.81 | 245.21 | 79.90 | 60.90 | 279.42 |

| 1. VANCOUVER | | | | | | | | | | | | | |
| --- | --- | --- | --- | --- | --- | --- | --- | --- | --- | --- | --- | --- | --- |
| Univariate RPs (years) | Design quantiles (AHMT (°C)) | Design quantiles (Corresponding maximum WGS (Time lag = 0day) (km/hr)) | OR-JRP (AHMT-WGS (Time lag = 0 day)  (Years) | AND-JRP (AHMT-WGS (Time lag = 0 day)  (Years) | Design quantiles (Corresponding maximum WGS (Time lag = ±1 days) (km/hr)) | OR-JRP (AHMT-WGS (Time lag = ±1 days)  (Years) | AND-JRP (AHMT-WGS (Time lag = ±1 days)  (Years) | Design quantiles (Corresponding maximum WGS (Time lag = ±2 days) (km/hr)) | OR-JRP (AHMT-WGS (Time lag = ±2 days)  (Years) | AND-JRP (AHMT-WGS (Time lag = ±2 days)  (Years) | Design quantiles (Corresponding maximum WGS (Time lag = ±3 days) (km/hr)) | OR-JRP (AHMT-WGS (Time lag = ±3 days)  (Years) | AND-JRP (AHMT-WGS (Time lag = ±3 days)  (Years) |
| 2 | 28.81 | 0.02 | 1.41 | 3.44 | 32.21 | 1.04 | 2.01 | 0.12 | 1.44 | 3.29 | 39.27 | 1.39 | 3.59 |
| 5 | 29.99 | 0.14 | 2.96 | 16.20 | 40.78 | 1.16 | 5.09 | 40.79 | 2.97 | 15.94 | 46.49 | 2.84 | 20.79 |
| 10 | 31.43 | 34.40 | 5.54 | 51.31 | 47.62 | 1.35 | 10.49 | 46.40 | 5.53 | 52.51 | 49.78 | 5.33 | 81.02 |
| 20 | 31.90 | 36.01 | 10.66 | 161.05 | 51.17 | 1.59 | 21.73 | 51.64 | 10.61 | 173.02 | 52.29 | 10.32 | 319.83 |
| 30 | 33.30 | 36.90 | 15.75 | 313.52 | 52.72 | 1.86 | 34.12 | 54.94 | 15.68 | 347.54 | 53.61 | 15.32 | 716.44 |
| 50 | 34.38 | 37.82 | 25.89 | 724.01 | 54.56 | 2.32 | 61.21 | 67.97 | 25.77 | 836.89 | 55.44 | 25.32 | 1982.95 |
| 70 | 34.39 | 38.80 | 36.01 | 1255.18 | 67.87 | 3.06 | 96.62 | 68.02 | 35.84 | 1493.21 | 67.88 | 35.32 | 3881.99 |
| 80 | 34.39 | 39.20 | 41.05 | 1560.55 | 67.92 | 4.11 | 129.60 | 68.03 | 40.87 | 1878.29 | 67.93 | 40.31 | 5065.86 |
| 90 | 34.40 | 39.44 | 46.10 | 1891.79 | 67.95 | 5.91 | 183.95 | 68.04 | 45.90 | 2300.44 | 67.96 | 45.32 | 6410.26 |
| 100 | 34.40 | 39.59 | 51.13 | 2246.18 | 67.98 | 8.73 | 271.06 | 68.05 | 50.92 | 2757.10 | 67.99 | 50.31 | 7911.39 |

| 1. REGINA | | | | | | | | | | | | | | | | | | | | | | | | | | |
| --- | --- | --- | --- | --- | --- | --- | --- | --- | --- | --- | --- | --- | --- | --- | --- | --- | --- | --- | --- | --- | --- | --- | --- | --- | --- | --- |
| Univariate RPs (years) | Design quantiles (AMWGS (km/hr) | | | Design quantiles (Corresponding highest MT (Time lag = 0day) (°C)) | OR-JRP (AMWGS-MT (Time lag = 0 day)  (Years) | | | AND-JRP (AMWGS-MT (Time lag = 0 day)  (Years) | | Design quantiles (Corresponding highest MT (Time lag = ±1 days) (°C)) | OR-JRP (AMWGS-MT (Time lag = ±1 days)  (Years) | | | AND-JRP (AMWGS-MT (Time lag = ±1 days)  (Years) | | Design quantiles (Corresponding highest MT (Time lag = ±2 days) (°C)) | OR-JRP (AMWGS-MT (Time lag = ±2 days)  (Years) | | | AND-JRP (AMWGS-MT (Time lag = ±2 days)  (Years) | | Design quantiles (Corresponding highest MT (Time lag = ±3 days) (°C)) | OR-JRP (AMWGS-MT (Time lag = ±3 days)  (Years) | | | AND-JRP (AMWGS-MT (Time lag = ±3 days)  (Years) |
| 2 | 102.87 | | | 26.58 | 1.46 | | | 3.16 | | 28.27 | 1.42 | | | 3.38 | | 29.10 | 1.41 | | | 3.45 | | 29.25 | 1.39 | | | 3.53 |
| 5 | 120.25 | | | 29.64 | 3.23 | | | 11.09 | | 31.57 | 3.05 | | | 13.77 | | 32.53 | 2.93 | | | 17.15 | | 32.90 | 2.88 | | | 18.76 |
| 10 | 133.11 | | | 31.19 | 6.04 | | | 29.14 | | 32.92 | 5.70 | | | 40.77 | | 33.70 | 5.45 | | | 61.04 | | 34.12 | 5.41 | | | 66.30 |
| 20 | 140.10 | | | 32.28 | 11.36 | | | 83.29 | | 33.84 | 10.83 | | | 130.08 | | 34.57 | 10.46 | | | 227.35 | | 35.16 | 10.45 | | | 234.36 |
| 30 | 143.24 | | | 32.77 | 16.54 | | | 161.20 | | 34.29 | 15.90 | | | 266.09 | | 34.96 | 15.47 | | | 498.23 | | 35.60 | 15.47 | | | 490.51 |
| 50 | 147.05 | | | 33.27 | 26.72 | | | 387.82 | | 34.78 | 25.96 | | | 677.78 | | 35.34 | 25.47 | | | 1353.73 | | 36.01 | 25.51 | | | 1243.78 |
| 70 | 149.35 | | | 33.55 | 36.82 | | | 708.57 | | 35.08 | 35.99 | | | 1275.51 | | 35.54 | 35.47 | | | 2627.43 | | 36.22 | 35.54 | | | 2295.68 |
| 80 | 150.18 | | | 33.65 | 41.85 | | | 904.16 | | 35.20 | 41.00 | | | 1644.20 | | 35.61 | 40.47 | | | 3421.14 | | 36.29 | 40.55 | | | 2928.26 |
| 90 | 150.86 | | | 33.74 | 46.88 | | | 1123.34 | | 35.29 | 46.01 | | | 2059.31 | | 35.67 | 45.47 | | | 4319.65 | | 36.36 | 45.57 | | | 3628.45 |
| 100 | 151.44 | | | 33.82 | 51.90 | | | 1365.93 | | 35.38 | 51.01 | | | 2520.80 | | 35.72 | 50.47 | | | 5321.98 | | 36.41 | 50.58 | | | 4395.60 |
| Univariate RPs (years) | | Design quantiles (AHMT (°C)) | Design quantiles (Corresponding maximum WGS (Time lag = 0day) (km/hr)) | | | OR-JRP (AHMT-WGS (Time lag = 0 day)  (Years) | AND-JRP (AHMT-WGS (Time lag = 0 day)  (Years) | | Design quantiles (Corresponding maximum WGS (Time lag = ±1 days) (km/hr)) | | | OR-JRP (AHMT-WGS (Time lag = ±1 days)  (Years) | AND-JRP (AHMT-WGS (Time lag = ±1 days)  (Years) | | Design quantiles (Corresponding maximum WGS (Time lag = ±2 days) (km/hr)) | | | OR-JRP (AHMT-WGS (Time lag = ±2 days)  (Years) | AND-JRP (AHMT-WGS (Time lag = ±2 days)  (Years) | | Design quantiles (Corresponding maximum WGS (Time lag = ±3 days) (km/hr)) | | | OR-JRP (AHMT-WGS (Time lag = ±3 days)  (Years) | AND-JRP (AHMT-WGS (Time lag = ±3 days)  (Years) | |
| 2 | | 36.29 | 50.46 | | | 1.43 | 3.33 | | 60.54 | | | 1.42 | 3.36 | | 65.51 | | | 1.41 | 3.47 | | 70.07 | | | 1.37 | 3.68 | |
| 5 | | 37.28 | 60.13 | | | 3.00 | 14.89 | | 77.06 | | | 2.91 | 17.60 | | 78.81 | | | 2.94 | 16.56 | | 82.43 | | | 2.85 | 20.61 | |
| 10 | | 37.68 | 75.02 | | | 5.62 | 45.23 | | 87.05 | | | 5.41 | 65.70 | | 87.99 | | | 5.52 | 53.05 | | 89.36 | | | 5.35 | 75.86 | |
| 20 | | 38.13 | 82.21 | | | 10.79 | 135.99 | | 93.87 | | | 10.41 | 253.33 | | 93.40 | | | 10.63 | 168.42 | | 93.78 | | | 10.37 | 279.21 | |
| 30 | | 38.44 | 90.37 | | | 15.93 | 258.09 | | 96.81 | | | 15.41 | 562.87 | | 95.79 | | | 15.71 | 330.11 | | 97.31 | | | 15.39 | 598.41 | |
| 50 | | 40.59 | 92.25 | | | 26.13 | 577.07 | | 100.32 | | | 25.41 | 1547.75 | | 99.90 | | | 25.84 | 768.99 | | 110.84 | | | 25.41 | 1563.48 | |
| 70 | | 40.60 | 93.05 | | | 36.30 | 978.86 | | 102.47 | | | 35.41 | 3020.24 | | 102.94 | | | 35.94 | 1340.48 | | 113.65 | | | 35.42 | 2942.91 | |
| 80 | | 40.60 | 93.31 | | | 41.37 | 1207.15 | | 103.25 | | | 40.41 | 3938.56 | | 103.87 | | | 40.98 | 1671.12 | | 114.18 | | | 40.43 | 3782.15 | |
| 90 | | 40.61 | 93.51 | | | 46.44 | 1452.22 | | 103.91 | | | 45.41 | 4980.08 | | 104.53 | | | 46.02 | 2029.63 | | 114.54 | | | 45.43 | 4721.44 | |
| 100 | | 40.61 | 93.67 | | | 51.50 | 1712.62 | | 104.46 | | | 50.41 | 6142.51 | | 105.02 | | | 51.05 | 2414.29 | | 114.80 | | | 50.43 | 5753.74 | |

| (g) EDMONTON | | | | | | | |
| --- | --- | --- | --- | --- | --- | --- | --- |
| Univariate RPs (years) | Design quantiles (AMWGS (km/hr)) | Design quantiles (Corresponding highest MT (Time lag = 0day) ((°C))) | OR-JRP (AMWGS-MT (Time lag = 0 day)  (Years) | OR-JRP (AMWGS-MT (Time lag = 0 day)  (Years) | Design quantiles (Corresponding MT (Time lag = ±1 days)) | OR-JRP (AMWGS-MT (Time lag = ±1 days)  (Years) | AND-JRP (AMWGS-MT (Time lag = ±1 days)  (Years) |
| 2 | 88.90 | 25.17 | 1.39 | 3.54 | 26.84 | 1.40 | 3.49 |
| 5 | 104.22 | 28.46 | 2.89 | 18.40 | 29.60 | 2.90 | 18.21 |
| 10 | 109.54 | 29.80 | 5.40 | 67.13 | 30.71 | 5.43 | 63.52 |
| 20 | 113.32 | 30.88 | 10.41 | 254.16 | 31.45 | 10.47 | 221.65 |
| 30 | 115.04 | 31.43 | 15.41 | 560.54 | 31.79 | 15.51 | 460.41 |
| 50 | 116.78 | 32.03 | 25.41 | 1531.39 | 32.17 | 25.55 | 1156.47 |
| 70 | 117.72 | 32.38 | 35.42 | 2979.74 | 32.41 | 35.59 | 2121.34 |
| 80 | 118.05 | 32.51 | 40.42 | 3881.99 | 32.50 | 40.60 | 2698.33 |
| 90 | 118.33 | 32.63 | 45.42 | 4904.36 | 32.57 | 45.62 | 3336.67 |
| 100 | 118.56 | 32.72 | 50.42 | 6045.95 | 32.64 | 50.63 | 4035.51 |
